# Supplementary material for: Circular RNA ZNF609 enhances proliferation and glycolysis during glioma progression by miR-378b/SLC2A1 axis
Source: Aging (Albany NY). 2021 Sep 14;13(17):21122–33. doi: 10.18632/aging.203331 (PMC8457557; doi:10.18632/aging.203331)
Supplement: Supplementary Figure 1 [file aging-13-203331-s001.pdf]

## SUPPLEMENTARY FIGURE

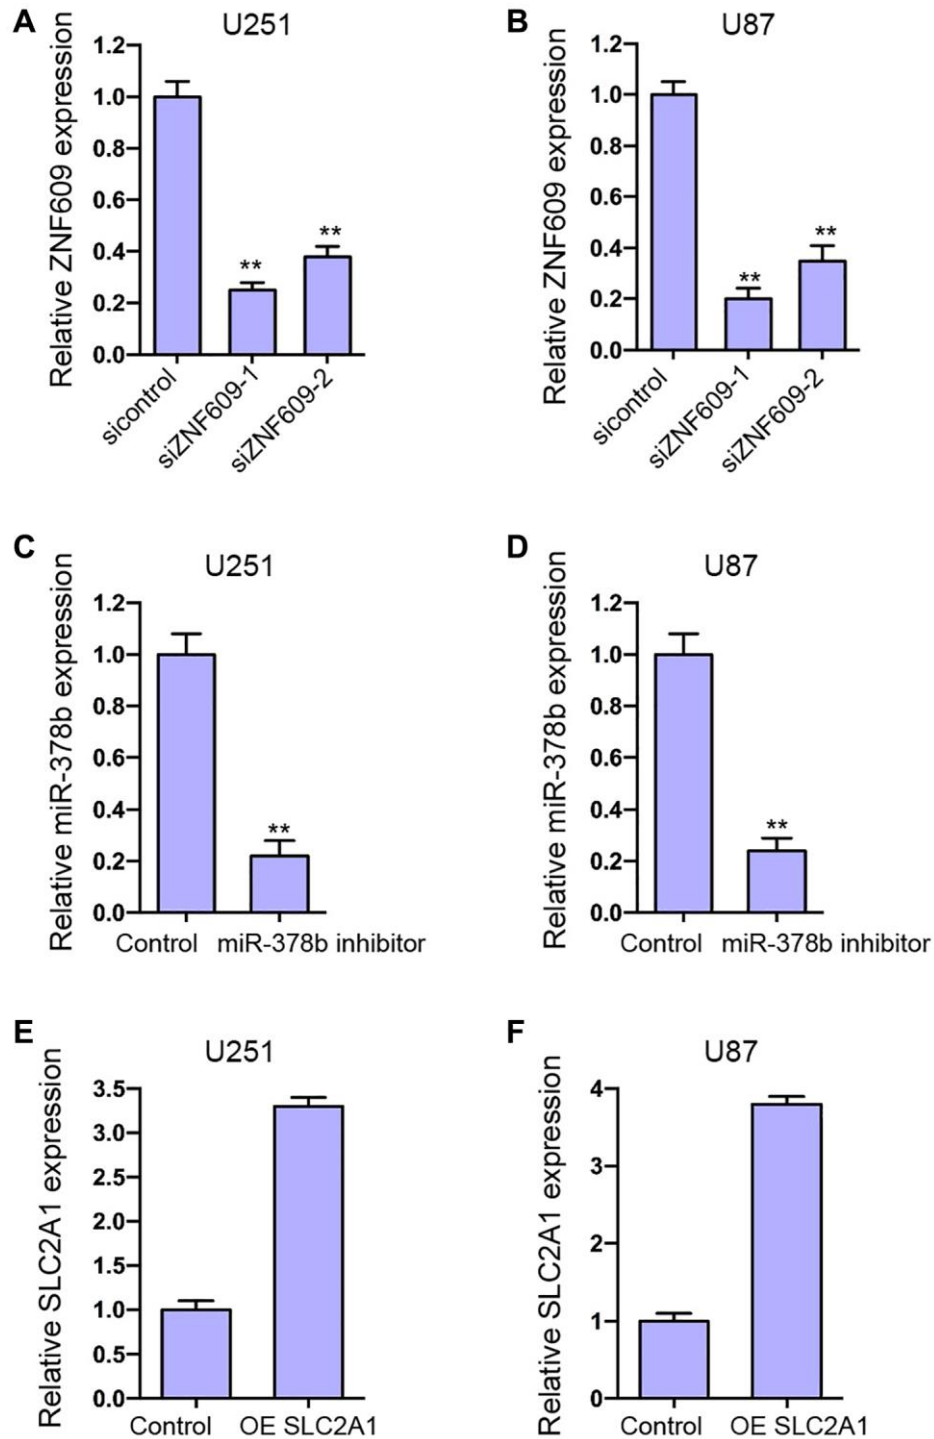

**Supplementary Figure 1. The validation of ZNF609 depletion, miR-378b inhibition, and SLC2A1 overexpression.** (A and B) The effectiveness of ZNF609 siRNAs was verified by qPCR in U251 and U87 cells. (C and D) The effectiveness of miR-378b inhibitor was verified by qPCR in U251 and U87 cells. (E and F) The effectiveness of SLC2A1 overexpression was verified by qPCR in U251 and U87 cells. mean  $\pm$  SD, \*\* $P < 0.01$ .
